# Supplementary material for: Solid state engineering of Bi2S3/rGO nanostrips: an excellent electrode material for energy storage applications
Source: Royal Society of Chemistry journal article supplement (doi:10.1039/d4ra01304b), 2024-01-01
Supplement: d4ra01304b1.pdf [file d4ra01304b1.pdf]

## Solid State Engineering of Bi<sub>2</sub>S<sub>3</sub>/rGO Nanostrips: An Excellent Electrode Material for Energy Storage Applications

Vijay B. Autade<sup>a,b</sup>, Kaustav Bhattacharjee<sup>b</sup>, Ranjit S. Kate<sup>b</sup>, Sudhir S. Arbuj<sup>b</sup>, Ramchandra S. Kalubarme<sup>b</sup>, Sanjay K. Apte<sup>b\*</sup>, Bharat B. Kale<sup>c\*</sup>, Sandeep A. Arote<sup>a\*</sup>

<sup>a</sup> Department of Physics, S.N. Arts, D.J.M. Commerce and B.N.S. Science College (Autonomous), Sangamner, Ahmednagar, 422 605, M.S., INDIA.

<sup>b</sup> Nanocrystalline Laboratory, Centre for Material for Electronic Technology (CMET), Govt. of India, Panchawati, Off Pashan Road, Pune 411007, INDIA.

<sup>c</sup> MIT World Peace University (MIT-WPU), Paud Rd, Kothrud, Pune, Maharashtra 411038.  
E-mail: [sandeparote@sangamnercollege.edu.in](mailto:sandeparote@sangamnercollege.edu.in), [bbkale1@gmail.com](mailto:bbkale1@gmail.com)

### Optimization of reaction parameters by Response Surface Methodology:

Central Composite design (CCD) of experiments by Design Expert software.

**Table S1:** Experimental matrix as computed from CCD and responses obtained from XRD phase analyses

| Run | Factor 1<br>A: Temperature<br>dC | Factor 2<br>B: Time<br>hrs | Factor 3<br>C:Precursor ratio<br>mole | Response<br>Phase purity |
|-----|----------------------------------|----------------------------|---------------------------------------|--------------------------|
| 1   | 153.636                          | 14                         | 4                                     | 1                        |
| 2   | 120                              | 14                         | 4                                     | 0                        |
| 3   | 140                              | 16                         | 2                                     | 0                        |
| 4   | 100                              | 16                         | 6                                     | 0                        |
| 5   | 120                              | 14                         | 4                                     | 0                        |
| 6   | 100                              | 12                         | 2                                     | 0                        |
| 7   | 140                              | 12                         | 2                                     | 0                        |
| 8   | 120                              | 14                         | 4                                     | 0                        |
| 9   | 120                              | 17.3636                    | 4                                     | 0                        |
| 10  | 120                              | 10.6364                    | 4                                     | 0                        |
| 11  | 120                              | 14                         | 7.36359                               | 1                        |
| 12  | 100                              | 12                         | 6                                     | 0                        |
| 13  | 86.3641                          | 14                         | 4                                     | 0                        |
| 14  | 120                              | 14                         | 0.636414                              | 0                        |
| 15  | 120                              | 14                         | 4                                     | 0                        |
| 16  | 120                              | 14                         | 4                                     | 0                        |
| 17  | 120                              | 14                         | 4                                     | 0                        |
| 18  | 140                              | 16                         | 6                                     | 1                        |
| 19  | 100                              | 16                         | 2                                     | 0                        |
| 20  | 140                              | 12                         | 6                                     | 1                        |

## Analysis

ANOVA for Quadratic model:

$$Y_{response} = \beta_0 + \beta_1A + \beta_2B + \beta_3C + \beta_{12}AB + \beta_{23}BC + \beta_{13}AC + \beta_{11}A^2 + \beta_{22}B^2 + \beta_{33}C^2$$

**Response:** Phase optimization

**Table S2:** Estimated values for the optimization of Bi<sub>2</sub>S<sub>3</sub> nanorod synthesis using CCD.

| Source                   | Sum of Squares | df | Mean Square | F-value   | p-value  |             |
|--------------------------|----------------|----|-------------|-----------|----------|-------------|
| <b>Model</b>             | 3.15           | 9  | 0.3501      | 71.34     | < 0.0001 | significant |
| <b>A-Temperature</b>     | 0.9926         | 1  | 0.9926      | 202.26    | < 0.0001 |             |
| <b>B-Time</b>            | 4.441E-16      | 1  | 4.441E-16   | 9.049E-14 | 1.0000   |             |
| <b>C-Precursor ratio</b> | 0.9926         | 1  | 0.9926      | 202.26    | < 0.0001 |             |
| <b>AB</b>                | 4.441E-16      | 1  | 4.441E-16   | 9.049E-14 | 1.0000   |             |
| <b>AC</b>                | 0.5000         | 1  | 0.5000      | 101.88    | < 0.0001 |             |
| <b>BC</b>                | 0.0000         | 1  | 0.0000      | 0.0000    | 1.0000   |             |
| <b>A<sup>2</sup></b>     | 0.3459         | 1  | 0.3459      | 70.48     | < 0.0001 |             |
| <b>B<sup>2</sup></b>     | 0.0069         | 1  | 0.0069      | 1.40      | 0.2637   |             |
| <b>C<sup>2</sup></b>     | 0.3459         | 1  | 0.3459      | 70.48     | < 0.0001 |             |
| <b>Residual</b>          | 0.0491         | 10 | 0.0049      |           |          |             |
| <b>Lack of Fit</b>       | 0.0491         | 5  | 0.0098      |           |          |             |
| <b>Pure Error</b>        | 0.0000         | 5  | 0.0000      |           |          |             |
| <b>Cor Total</b>         | 3.20           | 19 |             |           |          |             |

Factor coding is **Coded**.

Sum of squares is **Type III - Partial**

The **Model F-value** of 71.34 implies the model is significant. There is only a 0.01% chance that an F-value this large could occur due to noise. **P-values** less than 0.0500 indicate model terms are significant. In this case A, C, AC, A<sup>2</sup>, C<sup>2</sup> are significant model terms. Values greater than 0.1000 indicate the model terms are not significant. If there are many insignificant model terms (not counting those required to support hierarchy), model reduction may improve your model.

Fit Statistics

**Table S3:** Statistical values obtained from the ANOVA test.

|                                |               |
|--------------------------------|---------------|
| <b>Std. Dev.</b>               | <b>0.0701</b> |
| <b>Mean</b>                    | 0.2000        |
| <b>C.V. %</b>                  | 35.03         |
| <b>R<sup>2</sup></b>           | 0.9847        |
| <b>Adjusted R<sup>2</sup></b>  | 0.9709        |
| <b>Predicted R<sup>2</sup></b> | 0.8840        |
| <b>Adeq Precision</b>          | 22.9933       |

The **Predicted R<sup>2</sup>** of 0.8840 is in reasonable agreement with the **Adjusted R<sup>2</sup>** of 0.9709; i.e., the difference is less than 0.2. **Adeq Precision** measures the signal to noise ratio. A ratio greater than 4 is desirable. Your ratio of 22.993 indicates an adequate signal. This model can be used to navigate the design space.

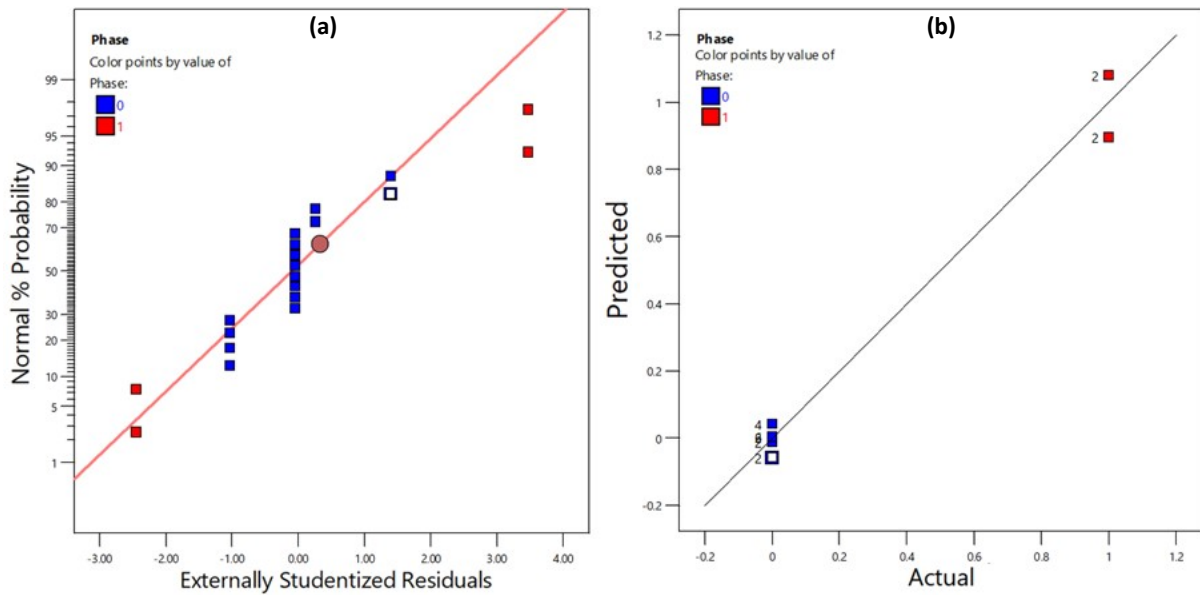

**Figure S1:** The normal probability plot and the predicted vs actual plot.

Y

$$\begin{aligned}
 &= 0.00334361 + 0.269593 * A + 1.13197 \times 10^{-17} * B + 0.269 \\
 &10^{-18} * AB + 0.25 * AC - 4.20817 \times 10^{-18} * BC + 0.154924 * A \\
 &- 0.021852 * B^2 + 0.154924 * C^2
 \end{aligned}$$

## Parameter interaction:

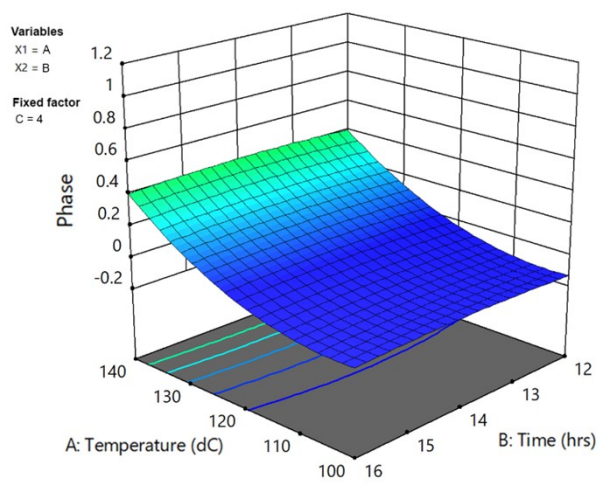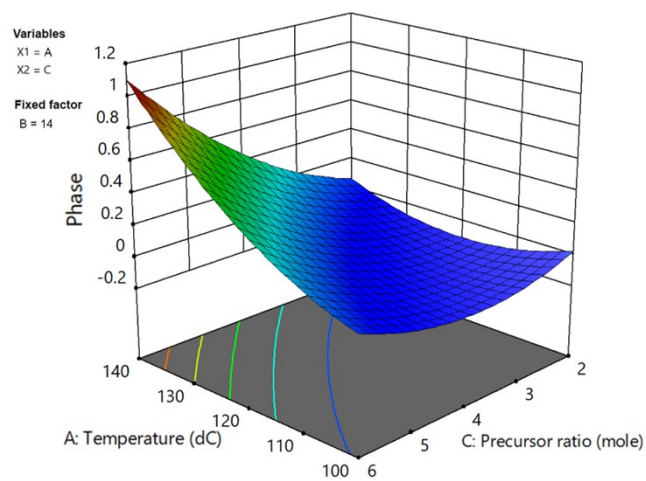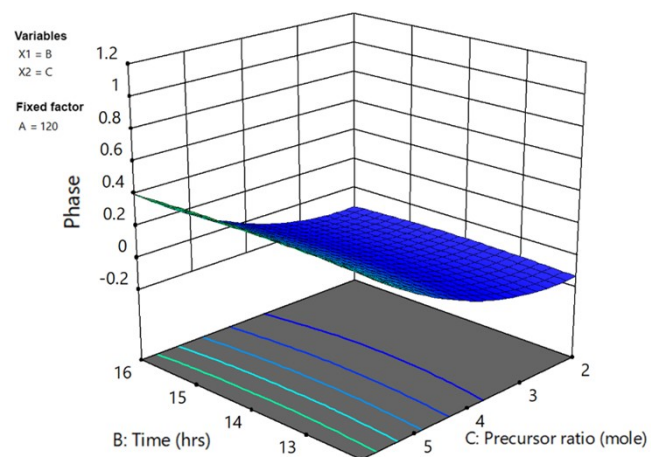

Figure S2: 3D surface plot for two interacting parameters keeping the other constant.

## Optimization:

**Table S4:** List of constrains for the optimization test.

| Name              | Goal        | Lower Limit | Upper Limit | Lower Weight | Upper Weight | Importance |
|-------------------|-------------|-------------|-------------|--------------|--------------|------------|
| A:Temperature     | is in range | 100         | 140         | 1            | 1            | 3          |
| B: Time           | is in range | 12          | 16          | 1            | 1            | 3          |
| C:Precursor ratio | is in range | 2           | 6           | 1            | 1            | 3          |
| Phase             | maximize    | 0           | 1           | 1            | 1            | 3          |

## Solutions

100 Solutions found. The best is selected as marked in blue.

**Table S5:** List of solutions with optimal reaction parameters for desired result.

| Number   | Temperature    | Time          | Precursor ratio | Phase        | Desirability |                 |
|----------|----------------|---------------|-----------------|--------------|--------------|-----------------|
| <b>1</b> | <b>139.061</b> | <b>12.776</b> | <b>5.957</b>    | <b>1.038</b> | <b>1.000</b> | <b>Selected</b> |
| 2        | 139.187        | 15.927        | 5.900           | 1.008        | 1.000        |                 |
| 3        | 138.167        | 14.524        | 5.965           | 1.012        | 1.000        |                 |
| 4        | 139.187        | 12.073        | 5.900           | 1.008        | 1.000        |                 |
| 5        | 140.000        | 12.000        | 6.000           | 1.081        | 1.000        |                 |
| 6        | 138.996        | 15.927        | 5.919           | 1.008        | 1.000        |                 |
| 7        | 140.000        | 16.000        | 6.000           | 1.081        | 1.000        |                 |
| 8        | 138.996        | 12.073        | 5.919           | 1.008        | 1.000        |                 |
| 9        | 139.062        | 15.673        | 5.912           | 1.013        | 1.000        |                 |
| 10       | 139.663        | 12.275        | 5.963           | 1.057        | 1.000        |                 |
| 11       | 138.899        | 12.689        | 5.903           | 1.009        | 1.000        |                 |
| 12       | 139.508        | 15.313        | 5.950           | 1.052        | 1.000        |                 |
| 13       | 139.025        | 13.558        | 5.974           | 1.051        | 1.000        |                 |
| 14       | 139.508        | 14.423        | 5.804           | 1.002        | 1.000        |                 |
| 15       | 139.637        | 12.990        | 5.811           | 1.005        | 1.000        |                 |
| 16       | 139.561        | 13.161        | 5.868           | 1.027        | 1.000        |                 |
| 17       | 139.144        | 12.246        | 5.974           | 1.040        | 1.000        |                 |
| 18       | 139.556        | 13.552        | 5.810           | 1.006        | 1.000        |                 |
| 19       | 139.825        | 13.279        | 5.935           | 1.066        | 1.000        |                 |
| 20       | 139.774        | 13.243        | 5.819           | 1.016        | 1.000        |                 |
| 21       | 139.334        | 15.678        | 5.947           | 1.038        | 1.000        |                 |
| 22       | 138.894        | 14.697        | 5.882           | 1.007        | 1.000        |                 |
| 23       | 138.526        | 15.687        | 5.946           | 1.005        | 1.000        |                 |
| 24       | 139.673        | 12.894        | 5.960           | 1.066        | 1.000        |                 |
| 25       | 139.898        | 12.504        | 5.866           | 1.031        | 1.000        |                 |
| 26       | 139.712        | 13.589        | 5.930           | 1.061        | 1.000        |                 |
| 27       | 139.143        | 12.968        | 5.991           | 1.058        | 1.000        |                 |
| 28       | 139.433        | 13.424        | 5.841           | 1.013        | 1.000        |                 |
| 29       | 139.101        | 14.907        | 5.870           | 1.008        | 1.000        |                 |
| 30       | 139.454        | 15.616        | 5.874           | 1.014        | 1.000        |                 |

|    |         |        |       |       |       |
|----|---------|--------|-------|-------|-------|
| 31 | 139.050 | 15.232 | 5.895 | 1.012 | 1.000 |
| 32 | 139.668 | 13.058 | 5.867 | 1.030 | 1.000 |
| 33 | 139.052 | 13.816 | 5.981 | 1.056 | 1.000 |
| 34 | 138.792 | 13.178 | 5.980 | 1.041 | 1.000 |
| 35 | 139.774 | 15.267 | 5.832 | 1.016 | 1.000 |
| 36 | 139.270 | 13.444 | 5.894 | 1.028 | 1.000 |
| 37 | 139.091 | 15.637 | 5.907 | 1.013 | 1.000 |
| 38 | 138.880 | 14.679 | 5.935 | 1.028 | 1.000 |
| 39 | 139.264 | 12.273 | 5.936 | 1.030 | 1.000 |
| 40 | 138.881 | 12.357 | 5.914 | 1.007 | 1.000 |
| 41 | 138.554 | 13.619 | 5.990 | 1.038 | 1.000 |
| 42 | 138.143 | 13.185 | 5.954 | 1.004 | 1.000 |
| 43 | 138.979 | 12.637 | 5.883 | 1.003 | 1.000 |
| 44 | 139.479 | 15.522 | 5.978 | 1.059 | 1.000 |
| 45 | 139.517 | 15.198 | 5.990 | 1.070 | 1.000 |
| 46 | 139.076 | 12.949 | 5.955 | 1.040 | 1.000 |
| 47 | 138.133 | 13.292 | 5.965 | 1.009 | 1.000 |
| 48 | 139.775 | 14.498 | 5.808 | 1.014 | 1.000 |
| 49 | 138.393 | 14.319 | 5.931 | 1.009 | 1.000 |
| 50 | 139.185 | 15.893 | 5.925 | 1.019 | 1.000 |
| 51 | 139.986 | 14.132 | 5.836 | 1.035 | 1.000 |
| 52 | 139.948 | 14.146 | 5.797 | 1.017 | 1.000 |
| 53 | 139.829 | 14.616 | 5.989 | 1.089 | 1.000 |
| 54 | 139.820 | 15.842 | 5.855 | 1.017 | 1.000 |
| 55 | 139.494 | 13.917 | 5.893 | 1.038 | 1.000 |
| 56 | 138.528 | 15.587 | 5.978 | 1.020 | 1.000 |
| 57 | 139.375 | 13.038 | 5.974 | 1.061 | 1.000 |
| 58 | 138.468 | 13.532 | 5.956 | 1.021 | 1.000 |
| 59 | 138.520 | 13.842 | 5.924 | 1.011 | 1.000 |
| 60 | 139.262 | 12.466 | 5.930 | 1.031 | 1.000 |
| 61 | 138.415 | 15.734 | 5.964 | 1.007 | 1.000 |
| 62 | 139.843 | 12.815 | 5.907 | 1.050 | 1.000 |
| 63 | 138.930 | 12.909 | 5.934 | 1.025 | 1.000 |
| 64 | 139.050 | 15.262 | 5.924 | 1.024 | 1.000 |
| 65 | 138.358 | 12.866 | 5.947 | 1.007 | 1.000 |
| 66 | 139.397 | 12.543 | 5.980 | 1.058 | 1.000 |
| 67 | 139.449 | 15.624 | 5.940 | 1.041 | 1.000 |
| 68 | 139.448 | 12.489 | 5.862 | 1.011 | 1.000 |
| 69 | 138.968 | 14.937 | 5.881 | 1.007 | 1.000 |
| 70 | 139.753 | 13.800 | 5.966 | 1.078 | 1.000 |
| 71 | 139.313 | 14.488 | 5.826 | 1.002 | 1.000 |
| 72 | 139.823 | 13.830 | 5.868 | 1.041 | 1.000 |
| 73 | 139.915 | 13.638 | 5.863 | 1.042 | 1.000 |
| 74 | 139.940 | 14.659 | 5.866 | 1.043 | 1.000 |
| 75 | 138.240 | 14.652 | 5.944 | 1.006 | 1.000 |
| 76 | 139.103 | 15.449 | 5.874 | 1.003 | 1.000 |
| 77 | 139.044 | 12.046 | 5.908 | 1.005 | 1.000 |
| 78 | 138.945 | 13.793 | 5.899 | 1.018 | 1.000 |
| 79 | 138.263 | 13.562 | 5.954 | 1.012 | 1.000 |
| 80 | 139.996 | 13.869 | 5.855 | 1.043 | 1.000 |
| 81 | 139.996 | 15.802 | 5.804 | 1.005 | 1.000 |
| 82 | 138.748 | 13.965 | 5.908 | 1.014 | 1.000 |

|     |         |        |       |       |       |
|-----|---------|--------|-------|-------|-------|
| 83  | 139.871 | 14.565 | 5.885 | 1.048 | 1.000 |
| 84  | 138.559 | 15.998 | 5.984 | 1.015 | 1.000 |
| 85  | 138.983 | 13.383 | 5.879 | 1.010 | 1.000 |
| 86  | 139.758 | 13.254 | 5.946 | 1.067 | 1.000 |
| 87  | 139.390 | 13.154 | 5.902 | 1.033 | 1.000 |
| 88  | 139.319 | 12.319 | 5.888 | 1.013 | 1.000 |
| 89  | 138.621 | 12.790 | 5.914 | 1.003 | 1.000 |
| 90  | 138.333 | 15.081 | 5.998 | 1.027 | 1.000 |
| 91  | 139.384 | 15.292 | 5.891 | 1.023 | 1.000 |
| 92  | 138.587 | 15.968 | 5.962 | 1.008 | 1.000 |
| 93  | 138.896 | 15.007 | 5.900 | 1.011 | 1.000 |
| 94  | 135.888 | 16.000 | 6.000 | 0.916 | 0.916 |
| 95  | 135.751 | 12.000 | 5.968 | 0.899 | 0.899 |
| 96  | 140.000 | 12.001 | 5.455 | 0.866 | 0.866 |
| 97  | 116.527 | 16.000 | 6.000 | 0.320 | 0.320 |
| 98  | 100.000 | 14.001 | 2.000 | 0.024 | 0.024 |
| 99  | 100.000 | 14.036 | 2.000 | 0.024 | 0.024 |
| 100 | 100.000 | 14.050 | 2.000 | 0.024 | 0.024 |

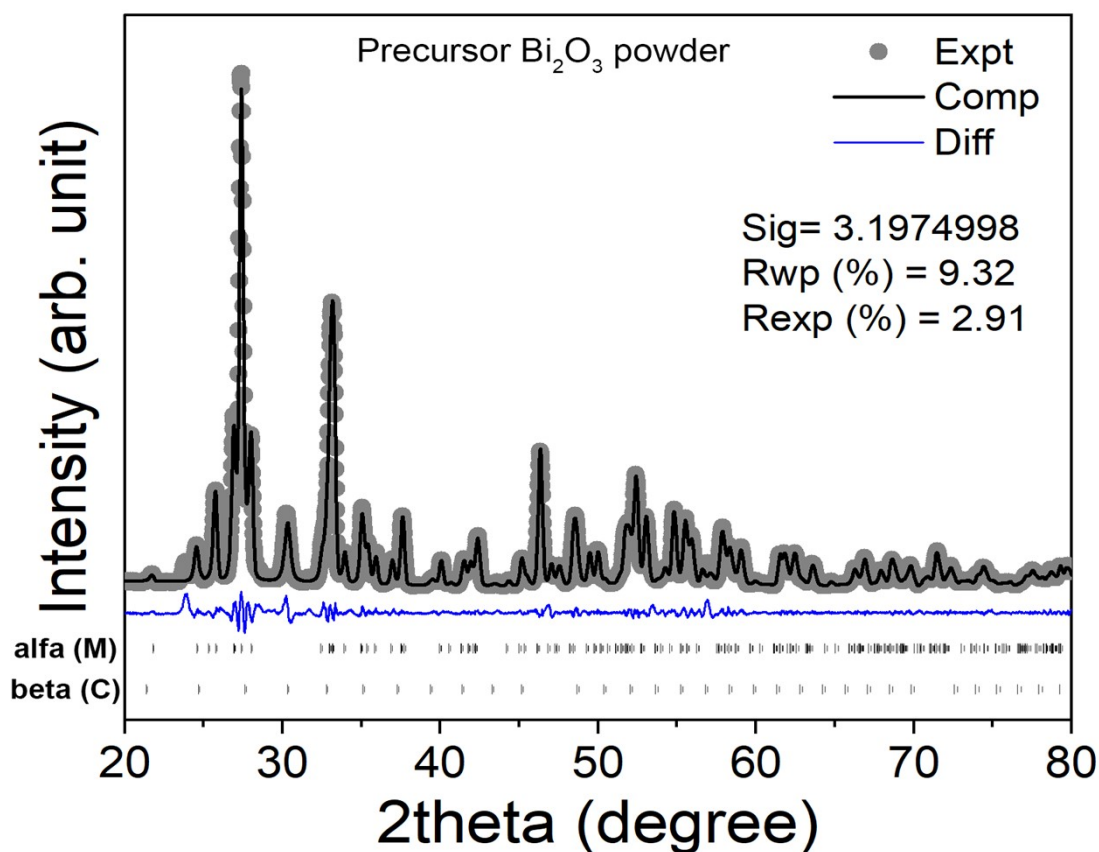

**Figure S3:** Rietveld refinement of powder X-ray diffraction pattern of precursor  $\text{Bi}_2\text{O}_3$  powder

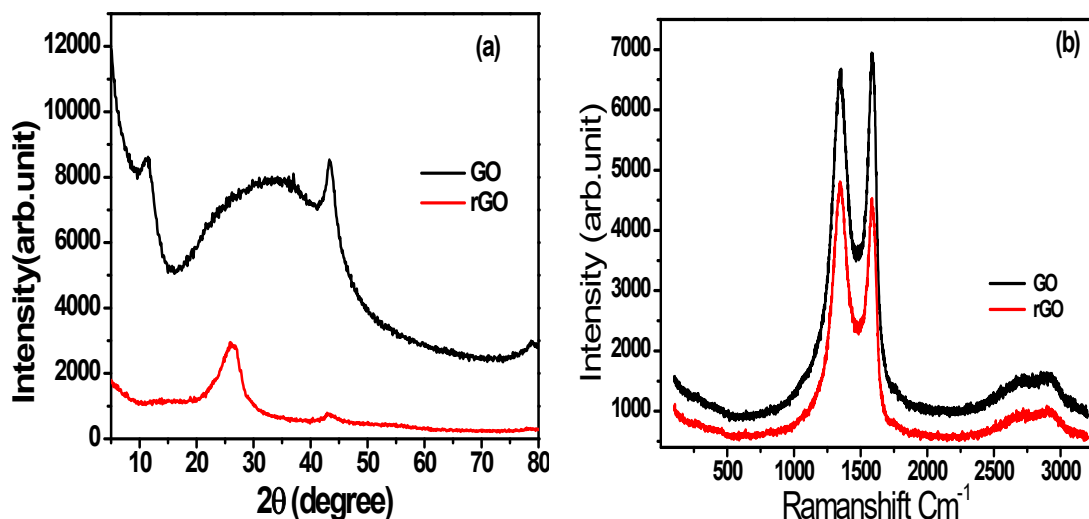

**Figure S4:** (a) XRD patterns and (b) Raman spectra of GO and rGO samples.

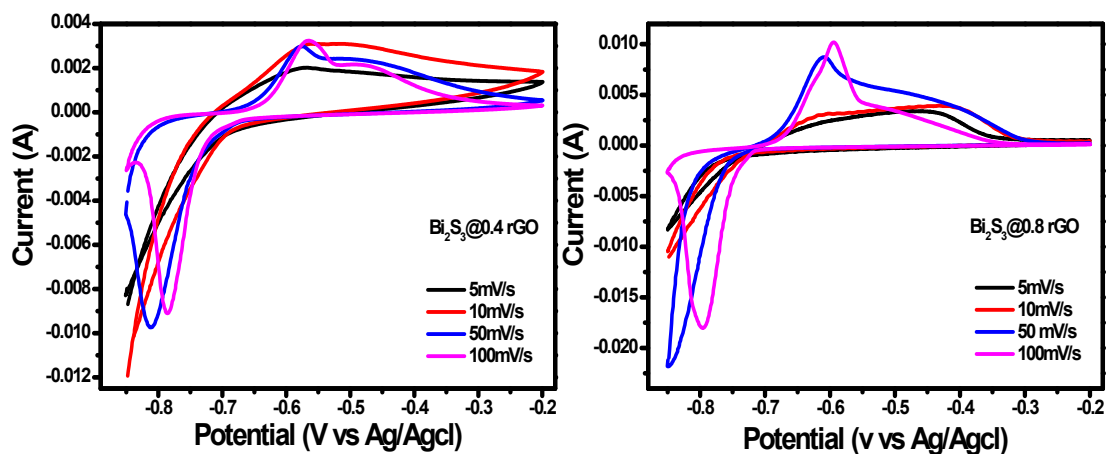

**Figure S5:** CV measurements of  $\text{Bi}_2\text{S}_3@0.4\text{rGO}$  and  $\text{Bi}_2\text{S}_3@0.8\text{rGO}$  at different scan rates (5–100 mV/s).

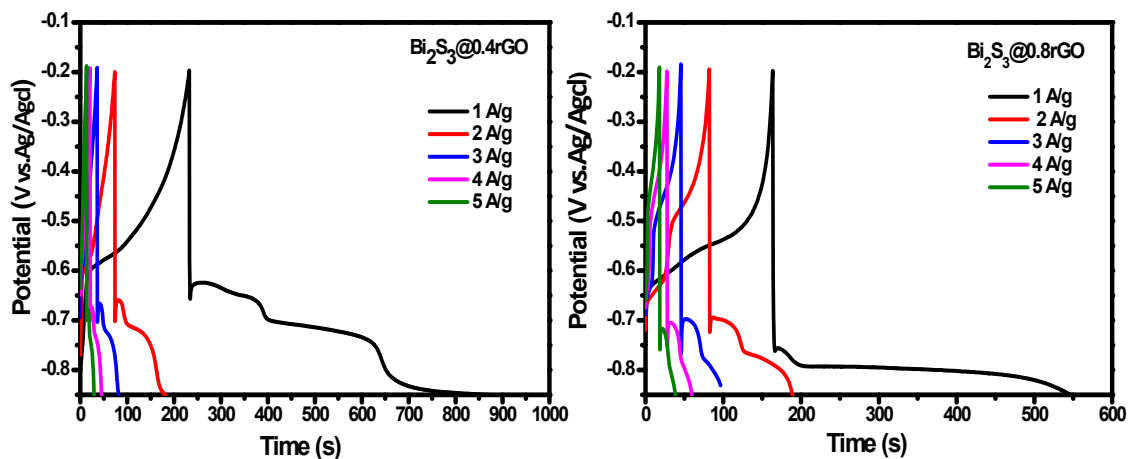

**Figure S6:** Galvanometric charge-discharge (GCD) of  $\text{Bi}_2\text{S}_3@0.4\text{rGO}$  and  $\text{Bi}_2\text{S}_3@0.8\text{rGO}$  at different current density 1-5  $\text{A/g}^{-1}$ .



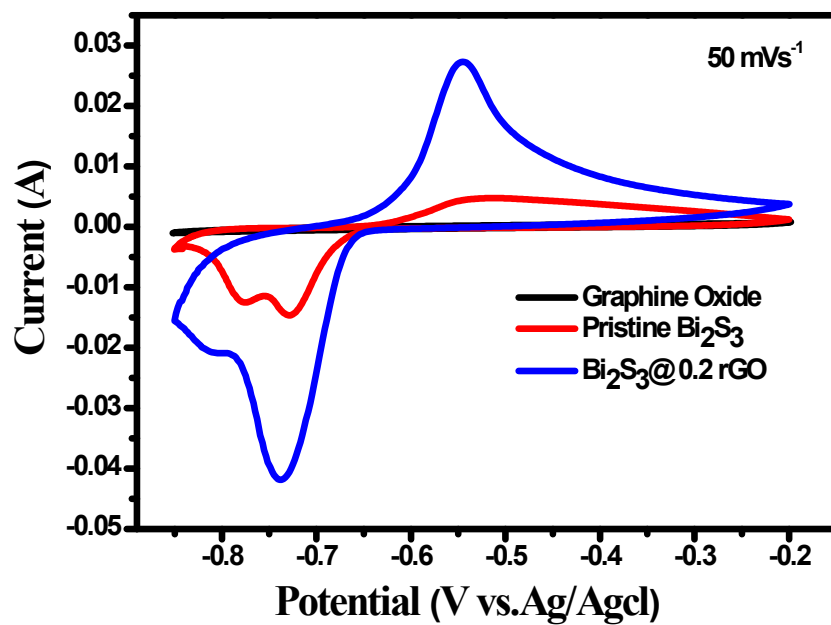

**Figure S7:** Comparison of CV curves between GO, pristine Bi<sub>2</sub>S<sub>3</sub> and Bi<sub>2</sub>S<sub>3</sub>@0.2rGO nanocomposite.
